# Supplementary material for: A computational study of CH4 storage in porous framework materials with metalated linkers: connecting the atomistic character of CH4 binding sites to usable capacity
Source: Royal Society of Chemistry journal article supplement (doi:10.1039/c6sc00529b), 2016-01-01
Supplement: c6sc00529b1.pdf [file c6sc00529b1.pdf]

Supporting Information

# A Computational Study of CH<sub>4</sub> Storage in Porous Framework Materials with Metalated Linkers: Connecting the Atomistic Character of CH<sub>4</sub> Binding Sites to Usable Capacity

Ehud Tsivion,<sup>†, §</sup> Jarad A. Mason,<sup>§</sup> Miguel I. Gonzalez,<sup>§</sup> Jeffrey R. Long,<sup>†, §, #</sup> Martin Head-Gordon<sup>‡, §, \*</sup>

<sup>†</sup> Materials Sciences Division and <sup>‡</sup> Chemical Sciences Division, Lawrence Berkeley National Laboratory, Berkeley, California 94720, United States.

<sup>§</sup> Department of Chemistry and <sup>#</sup> Department of Chemical and Biomolecular Engineering, University of California, Berkeley, California 94720, United States

## Table of Content

---

|                                                                                                                                                    |    |
|----------------------------------------------------------------------------------------------------------------------------------------------------|----|
| Evaluation of CH <sub>4</sub> capacity of metalated MOF-5 and UiO-67-bpy.....                                                                      | 2  |
| Representation of the parent MOF usable capacity.....                                                                                              | 3  |
| Optimized structures of solvent@catechol-Ca.....                                                                                                   | 4  |
| The effect of adsorption entropy ( $\Delta S_{\text{ads}}$ ) on expected capacities .....                                                          | 5  |
| Full Energy Decomposing Analysis (EDA) tables .....                                                                                                | 7  |
| Synthesis of Zr <sub>6</sub> O <sub>4</sub> (OH) <sub>4</sub> (bpydc) <sub>6</sub> (bpydc <sup>2-</sup> = 2,2'-bipyridine-5,5'-dicarboxylate)..... | 8  |
| High-Pressure CH <sub>4</sub> Adsorption .....                                                                                                     | 8  |
| Comparison to experiment: CH <sub>4</sub> adsorption of in MOF-5 .....                                                                             | 10 |
| References.....                                                                                                                                    | 13 |

## Evaluation of CH<sub>4</sub> capacity of metalated MOF-5 and UiO-67-bpy

The following section explains the reasoning and assumptions behind the estimation of the capacities of child-MOFs derived from parent-MOFs by the addition of open-metal sites (OMSs). The parent MOFs that are studied are MOF-5,(1) to be modified with catechol (cat) linkers metalated with Ca and Mg ions, and UiO-67-bpy(2) where the bipyridine (bpy) linkers are metalated with MX<sub>2</sub> type metals (M<sup>2+</sup>) and counter-ions (X<sup>-</sup>). The following approximations are assumed:

1. There is no material density loss due to imperfect packing of the material.
2. Pore window size allow for free diffusion of the CH<sub>4</sub> molecules in the material.
3. No overlap between CH<sub>4</sub> adsorbed on the OMS adsorbed and CH<sub>4</sub> adsorbed in other places.
4. 100% percent linker metalation.

The maximal addition of usable CH<sub>4</sub> capacity ( $\Delta n_{oms}$ ), in v[STP]/v units, as a result of the introduction of the open-metal sites to the structure of the parent MOF is evaluated as follows:

$$\Delta n_{oms} = \Delta \theta_{uo} \times \frac{c_{oms}}{c_{CH_4}^{STP}} = \Delta \theta_{uc} \times n_{1CH_4}$$

Where  $\Delta \theta_{uo}$  is the usable site-occupancy,  $c_{oms}$  is the molar concentration of the open-metal sites in the parent MOF,  $c_{CH_4}^{STP}$  is the molar concentration of CH<sub>4</sub> at standard conditions (25 °C, 1 atm). The quantity  $n_{1CH_4}$  corresponds to the amount of methane adsorbed in the MOF if a single CH<sub>4</sub> molecule occupies the open-metal site, in v[STP]/v units. Calculation of  $\Delta \theta_{uo}$ , the usable site-occupancy, is described in detail in the paper.

Assuming 100% metalation of the linkers, the open-metal sites concentration,  $c_{oms}$ , is equal to the concentration of the linkers  $c_{linker}$ , i.e.  $c_{oms} = c_{linker}$ . The linker/OMS concentration is evaluated as follows:

$$c_{linker} = \frac{N_{linker}}{V_{cell} \cdot N_A}$$

where  $V_{cell}$  is the volume of the unit cell in [L] units,  $N_A$  is Avogadro's number in [ $mol^{-1}$ ] units and  $N_{linker}$  is the number of linkers in a unit-cell.

The concentration of linker in the parent MOF-5 and UiO-67-bpy, as well as other relevant values, is listed in the following table:

|                              | MOF-5    | UiO-67-bpy |
|------------------------------|----------|------------|
| $V_{cell}$ [Å <sup>3</sup> ] | 16913.24 | 18651.79   |
| $N_{linker}$                 | 24       | 24         |
| $c_{linker}$ [mol/L]         | 2.36     | 2.14       |
| $n_{1CH_4}$ v[STP]/v         | 52.79    | 47.87      |

The maximal expected usable capacity of a child MOFs ( $n_{child}$ ), as a result of the introduction of open-metal site into it parent MOF, is estimated using:

$$n_{child} = n_{parent} + n_{oms}$$

The experimental data, including the usable capacity of the parent MOFs  $n_{parent}$ , for MOF-5 and UiO-67-bpy is reported by Mason et al.(3) and here in section “High-Pressure CH<sub>4</sub> Adsorption” respectively. For the parent MOFs the usable capacity is evaluated using the CH<sub>4</sub> total adsorption isotherms at 25 °C, fitted to a single-site Langmuir equation:

$$n_{ads}(p) = n_{sat} \times \frac{K \cdot p}{1 + K \cdot p}$$

where  $n_{ads}(p)$  is the amount of CH<sub>4</sub> adsorbed in the parent MOF at a given pressure  $p$ , in v[STP]/v units.  $n_{sat}$  is the capacity of the parent MOF at full saturation in v [STP]/v units, and  $K$  is the Langmuir parameter in bar<sup>-1</sup>. The fitted parameters obtained are:

|            | $K$    | $n_{sat}$ | $n_{parent}$<br>v[STP]/v<br>5.8-35<br>bar | $n_{parent}$<br>v[STP]/v<br>5.8-65<br>bar |
|------------|--------|-----------|-------------------------------------------|-------------------------------------------|
| MOF-5      | 0.0146 | 440       | 114                                       | 180                                       |
| UiO-67-bpy | 0.0287 | 321       | 115                                       | 163                                       |

## Representation of the parent MOF usable capacity

The non-metalated parent MOFs have substantial CH<sub>4</sub> capacity by their own, dictated by their structure and composition. Methane adsorption in the parent MOFs also occurs on well-defined centers, most likely on the metal-clusters (or just “clusters”), which are more reactive with respect to the (non-metalated) linkers, as evident from previous experimental and computational studies.

To increase the readability of the paper, we compare the expected usable site occupancy of the open-metal sites to that of the clusters in the parent MOFs. This is done by rewriting the Langmuir equation, to obtain  $\theta_{cluster}$ , cluster occupancy values that are comparable to  $\theta_{oms}$ , the occupancy of the open-metal sites. However, the metal clusters contain several metal ions, therefore for a balanced comparison  $\theta_{cluster}$  is evaluated per metal-ion in the cluster, such that metal in the clusters are compared vs. the metals on the linkers.

In the new representation, each metal in the cluster can adsorb  $\theta_{max}$  number of methane molecules, each of which contributes  $n_{cluster}$  to the MOF capacity. The Langmuir equation takes the following form:

$$n_{ads}(p) = n_{sat} \times \frac{K \cdot p}{1 + K \cdot p} = n_{1CH_4\_cluster} \times \theta_{max} \times \frac{K \cdot p}{1 + K \cdot p} = n_{1CH_4\_cluster} \times \theta_{cluster}(p)$$

The quantity  $n_{1CH_4\_cluster}$  corresponds to the amount of methane adsorbed in the MOF if a single CH<sub>4</sub> molecule occupies the one metal ion in the cluster (cluster-metal). This number is different from  $n_{1CH_4}$  of the open-metal site, since the number/concentration of cluster-metals is different from the number of open-metal sites. Since the value of the Langmuir expression  $\frac{K \cdot p}{1 + K \cdot p}$  swings between zero and one, the value of  $\theta_{cluster}$  swings between zero (cluster-metal is completely empty) and  $\theta_{max}$  (cluster-metal is occupied by  $\theta_{max}$  number of methane molecules). Since fitting to the single-site Langmuir model is an approximation, the value of  $\theta_{max}$  is not necessarily an integer and is straightforwardly given by:

$$\theta_{max} = n_{sat} / n_{1CH_4\_cluster}$$

The values obtained for the parent MOFs are:

|                                       | MOF-5 | UiO-67-bpy |
|---------------------------------------|-------|------------|
| $N_{cluster-metals}$                  | 32    | 24         |
| $n_{1CH_4\_cluster} \text{ v[STP]/v}$ | 70.38 | 47.87      |
| $\theta_{max}$                        | 6.25  | 6.7        |

## Optimized structures of solvent@catechol-Ca

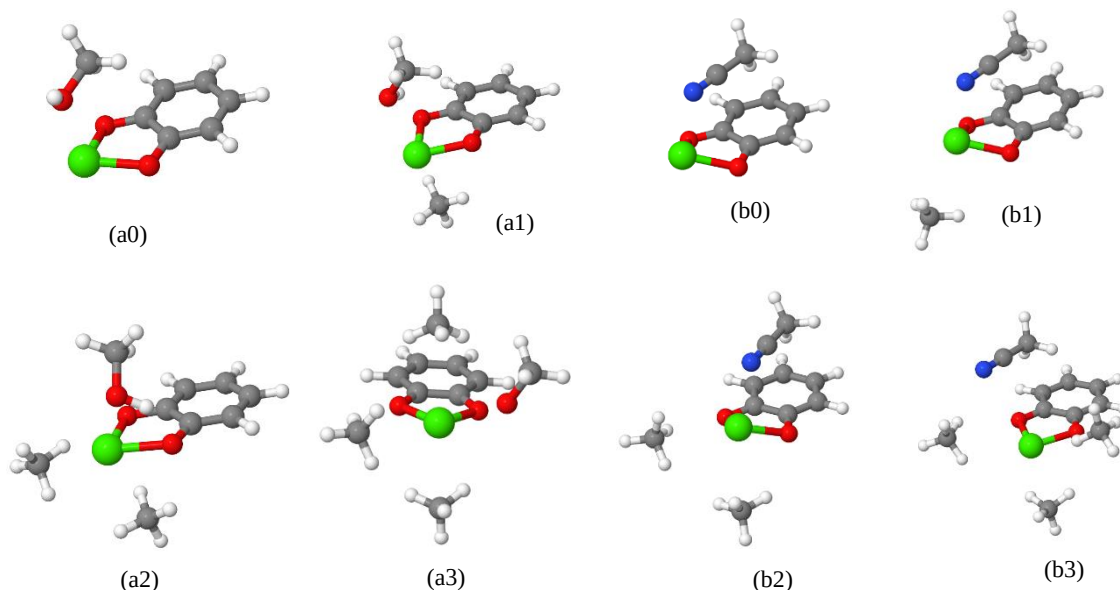

Figure S1. CH<sub>4</sub> adsorbed on metalated cat-Ca linkers in the presence of solvent molecule. Panels (a0-a3) and (b0-b3) show MeOH and MeCN solvents-complexes, consecutively. As one solvent molecule is coordinated to the metal, no more than three CH<sub>4</sub> molecules can have significant contribution to the CH<sub>4</sub> capacity of the MOF at ambient conditions.

## The effect of adsorption entropy ( $\Delta S_{\text{ads}}$ ) on expected capacities

Since accurate evaluation of the entropy of adsorption ( $\Delta S_{\text{ads}}$ ) is currently not computationally feasible (as explained in the paper), the adsorption entropy was assumed to be approximately constant for all adsorbed  $\text{CH}_4$  molecules. The value of  $\Delta S_{\text{ads}} = -9.5 \text{ kJ mol}^{-1} \text{ K}^{-1}$  which represent an intermediate of values measured for materials for adsorptive storage applications.(3,4) Here, we study the implications of this assumption by looking at two other options for evaluating  $\Delta S_{\text{ads}}$ . In the first case the entropy is taken to be  $\Delta S_{\text{max}} = -10.0 \text{ kJ mol}^{-1} \text{ K}^{-1}$  which is a rather large value that was measured for  $\text{CH}_4$  adsorption in  $\text{Ni}_2(\text{dobdc})$ . For the second case we assume that there exists a relation between  $\Delta H$  and  $\Delta S$  such that stronger adsorption enthalpies result in larger changes in entropies,  $\Delta S$  is estimated using a linear calibration curve based on previously obtained data for the first  $\text{CH}_4$  adsorption sites for several MOFs (

Table S1).

| MOF name                    | $\Delta H$ | $\Delta S$ |
|-----------------------------|------------|------------|
| AX-21                       | -10.7      | -9.20      |
| MOF-5                       | -12.3      | -9.20      |
| HKUST-11                    | -17.1      | -9.70      |
| $\text{Mg}_2(\text{dobdc})$ | -18.6      | -9.60      |
| $\text{Co}_2(\text{dobdc})$ | -19.7      | -9.70      |
| $\text{Ni}_2(\text{dobdc})$ | -21        | -10.00     |

Table S1. Adsorption enthalpies of entropies measured for different MOFs.

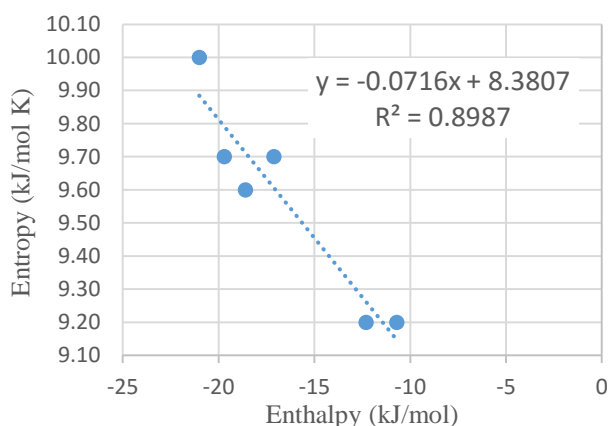

Figure S2. Calibration curve for fitting  $\Delta S$  to  $\Delta H$ .

Overall, for most of the cases studied in the article which result in significant CH<sub>4</sub> usable capacity, increasing the values of  $\Delta S_{\text{ads}}$  doesn't significantly affect the nature of the results, and in some cases results in higher capacities due to relaxation of over-bounded CH<sub>4</sub> at low pressures. Exact numbers are given below at Table S2.

Table S2. Comparison of various  $\Delta S_{\text{ads}}$  on the differential occupancy.

|                                 | $\Delta\theta$ (35 bar) |
|---------------------------------|-------------------------|
| Cat-Mg                          | 1.13                    |
| Cat-Mg- $\Delta S_{\text{max}}$ | 0.89                    |
| Cat-Mg- $\Delta S_{\text{fit}}$ | 1.15                    |

|                                      |      |
|--------------------------------------|------|
| MeOH@cat-Mg                          | 1.10 |
| MeOH@cat-Mg- $\Delta S_{\text{max}}$ | 1.32 |
| MeOH@cat-Mg- $\Delta S_{\text{fit}}$ | 1.29 |

|                                      |      |
|--------------------------------------|------|
| MeCN@cat-Mg                          | 1.20 |
| MeCN@cat-Mg- $\Delta S_{\text{max}}$ | 0.97 |
| MeCN@cat-Mg- $\Delta S_{\text{fit}}$ | 1.27 |

|                                 |      |
|---------------------------------|------|
| Cat-Ca                          | 0.34 |
| Cat-Ca- $\Delta S_{\text{max}}$ | 0.59 |
| Cat-Ca- $\Delta S_{\text{fit}}$ | 0.58 |

|                                      |      |
|--------------------------------------|------|
| MeOH@cat-Ca                          | 0.49 |
| MeOH@cat-Ca- $\Delta S_{\text{max}}$ | 0.75 |
| MeOH@cat-Ca- $\Delta S_{\text{fit}}$ | 0.71 |

|                                      |      |
|--------------------------------------|------|
| MeCN@cat-Ca                          | 1.03 |
| MeCN@cat-Ca- $\Delta S_{\text{max}}$ | 1.44 |
| MeCN@cat-Ca- $\Delta S_{\text{fit}}$ | 1.29 |

|                                 |      |
|---------------------------------|------|
| NTA-Ca                          | 1.90 |
| NTA-Ca- $\Delta S_{\text{max}}$ | 1.86 |
| NTA-Ca- $\Delta S_{\text{fit}}$ | 1.92 |

|                                 |      |
|---------------------------------|------|
| NTA-Mg                          | 0.29 |
| NTA-Mg- $\Delta S_{\text{max}}$ | 0.36 |
| NTA-Mg- $\Delta S_{\text{fit}}$ | 0.34 |

|                                                 |      |
|-------------------------------------------------|------|
| bpy-CuCl <sub>2</sub>                           | 0.32 |
| bpy-CuCl <sub>2</sub> - $\Delta S_{\text{max}}$ | 0.21 |
| bpy-CuCl <sub>2</sub> - $\Delta S_{\text{fit}}$ | 0.40 |

|                                                 |      |
|-------------------------------------------------|------|
| bpy-ZnCl <sub>2</sub>                           | 0.15 |
| bpy-ZnCl <sub>2</sub> - $\Delta S_{\text{max}}$ | 0.09 |
| bpy-ZnCl <sub>2</sub> - $\Delta S_{\text{fit}}$ | 0.22 |

|                                                 |      |
|-------------------------------------------------|------|
| bpy-CaCl <sub>2</sub>                           | 0.54 |
| bpy-CaCl <sub>2</sub> - $\Delta S_{\text{max}}$ | 0.82 |
| bpy-CaCl <sub>2</sub> - $\Delta S_{\text{fit}}$ | 0.74 |

## Full Energy Decomposing Analysis (EDA) tables

| Cat-Mg |              |              |             |             |                |
|--------|--------------|--------------|-------------|-------------|----------------|
|        | $\Delta$ FRZ | $\Delta$ POL | $\Delta$ CT | $\Delta$ GD | $\Delta$ Total |
| 1      | 10.0         | -49.9        | -6.3        | 5.5         | -40.7          |
| 2      | 13.7         | -33.6        | -8.9        | 1.8         | -27.0          |
| 3      | 11.2         | -17.9        | -8.2        | 0.3         | -14.6          |
| 4      | -12.2        | -1.0         | -5.7        | 1.8         | -17.1          |

| Cat-Mg-methanol |              |              |             |             |                |
|-----------------|--------------|--------------|-------------|-------------|----------------|
|                 | $\Delta$ FRZ | $\Delta$ POL | $\Delta$ CT | $\Delta$ GD | $\Delta$ Total |
| 1               | 8.9          | -36.7        | -6.5        | 13.6        | -20.7          |
| 2               | 0.5          | -13.2        | -8.2        | 1.0         | -19.9          |
| 3               | -8.0         | -4.2         | -4.2        | -0.1        | -16.5          |

| Cat-Mg-acetonitril |              |              |             |             |                |
|--------------------|--------------|--------------|-------------|-------------|----------------|
|                    | $\Delta$ FRZ | $\Delta$ POL | $\Delta$ CT | $\Delta$ GD | $\Delta$ Total |
| 1                  | 7.3          | -21.1        | -6.9        | 3.4         | -17.3          |
| 2                  | -4.6         | -13.0        | -4.3        | 6.4         | -15.5          |
| 3                  | -3.4         | -3.6         | -4.3        | -1.2        | -12.5          |

| Cat-Ca |              |              |             |             |                |
|--------|--------------|--------------|-------------|-------------|----------------|
|        | $\Delta$ FRZ | $\Delta$ POL | $\Delta$ CT | $\Delta$ GD | $\Delta$ Total |
| 1      | 0.8          | -19.9        | -10.3       | 2.6         | -26.7          |
| 2      | 0.8          | -17.6        | -8.5        | 0.6         | -24.7          |
| 3      | 0.1          | -16.0        | -7.6        | 1.7         | -21.7          |
| 4      | 0.1          | -16.4        | -7.8        | 1.9         | -22.2          |

| Cat-Ca-Methanol |              |              |             |             |                |
|-----------------|--------------|--------------|-------------|-------------|----------------|
|                 | $\Delta$ FRZ | $\Delta$ POL | $\Delta$ CT | $\Delta$ GD | $\Delta$ Total |
| 1               | -0.2         | -18.2        | -9.0        | 4.2         | -23.2          |
| 2               | -0.9         | -15.5        | -7.5        | 1.5         | -22.5          |
| 3               | 0.1          | -13.8        | -9.2        | 2.6         | -20.3          |

| Cat-Ca-Acetonitril |              |              |             |             |                |
|--------------------|--------------|--------------|-------------|-------------|----------------|
|                    | $\Delta$ FRZ | $\Delta$ POL | $\Delta$ CT | $\Delta$ GD | $\Delta$ Total |
| 1                  | 0.6          | -16.7        | -8.0        | 1.4         | -22.6          |
| 2                  | -1.3         | -14.4        | -7.5        | 5.7         | -17.6          |
| 3                  | -1.5         | -13.9        | -7.3        | 1.6         | -21.0          |

| NTA-Ca |              |              |             |             |                |
|--------|--------------|--------------|-------------|-------------|----------------|
|        | $\Delta$ FRZ | $\Delta$ POL | $\Delta$ CT | $\Delta$ GD | $\Delta$ Total |
| 1      | -2.2         | -9.7         | -6.3        | 0.8         | -17.4          |
| 2      | -3.4         | -8.1         | -6.4        | 0.8         | -17.0          |
| 3      | -3.8         | -9.1         | -6.5        | 1.1         | -18.2          |

| NTA-Mg |              |              |             |             |                |
|--------|--------------|--------------|-------------|-------------|----------------|
|        | $\Delta$ FRZ | $\Delta$ POL | $\Delta$ CT | $\Delta$ GD | $\Delta$ Total |
| 1      | -1.4         | -14.8        | -5.4        | 1.2         | -20.4          |

| bpy-CuCl <sub>2</sub> |              |              |             |             |                |
|-----------------------|--------------|--------------|-------------|-------------|----------------|
|                       | $\Delta$ FRZ | $\Delta$ POL | $\Delta$ CT | $\Delta$ GD | $\Delta$ Total |
| 1                     | -7.1         | -2.8         | -3.2        | 0.2         | -12.9          |
| 2                     | -4.3         | -4.1         | -3.7        | 1.9         | -10.2          |

| bpy-ZnCl <sub>2</sub> |              |              |             |             |                |
|-----------------------|--------------|--------------|-------------|-------------|----------------|
|                       | $\Delta$ FRZ | $\Delta$ POL | $\Delta$ CT | $\Delta$ GD | $\Delta$ Total |
| 1                     | -3.9         | -2.6         | -3.8        | 0.1         | -10.1          |
| 2                     | -3.9         | -2.5         | -3.9        | 0.3         | -10.1          |

| bpy-CaCl <sub>2</sub> |              |              |             |             |                |
|-----------------------|--------------|--------------|-------------|-------------|----------------|
|                       | $\Delta$ FRZ | $\Delta$ POL | $\Delta$ CT | $\Delta$ GD | $\Delta$ Total |
| 1                     | -1.2         | -11.8        | -9.5        | -21.1       | -19.8          |
| 2                     | -3.9         | -11.4        | -9.5        | -23.7       | -21.3          |

## Synthesis of $\text{Zr}_6\text{O}_4(\text{OH})_4(\text{bpydc})_6$ ( $\text{bpydc}^{2-} = 2,2'$ -bipyridine-5,5'-dicarboxylate)

The compound  $\text{Zr}_6\text{O}_4(\text{OH})_4(\text{bpydc})_6$ , which is referred to as UiO-67-bpy in this work, was synthesized as previously reported.(5)

## High-Pressure $\text{CH}_4$ Adsorption

The high-pressure adsorption isotherm for UiO-67-bpy was measured on a HPVA-II-100 from Particulate Systems, a Micromeritics company. Here, activated sample was loaded into a tared 2 mL stainless steel sample holder inside a glovebox under a  $\text{N}_2$  atmosphere. Prior to connecting the sample holder to the VCR fittings of the complete high-pressure assembly inside the glove box, the sample holder was weighed to determine the sample mass. The sample holder was then transferred to the HPVA-II-100, connected to the instrument's analysis port via an OCR fitting, and evacuated at room temperature for at least 1 h. The sample holder was placed inside an aluminum recirculating dewar connected to a Julabo FP89-HL isothermal bath filled with Julabo Thermal C2 fluid. The temperature stability of the isothermal bath is  $\pm 0.02$  °C. Methods for accurately measuring the sample freespace, which involve the expansion of He from a calibrated volume at 0.7 bar and 25 °C to the evacuated sample holder, were described in detail previously.(3) Nonideality corrections were performed using the  $\text{CH}_4$  compressibility factors tabulated in the NIST REFPROP database for each measured temperature and pressure.(6)

The experimentally measured excess amounts adsorbed were converted to total amounts adsorbed using the equation below, where  $n_{ex}$  is the excess amount adsorbed in mmol/g,  $n_{tot}$  is the total amount adsorbed in mmol/g,  $V_p$  is the pore volume in  $\text{cm}^3/\text{g}$ , and  $\rho_{bulk}$  is the bulk density of pure  $\text{CH}_4$ .

$$n_{tot} = n_{ex} + V_p \cdot \rho_{bulk}(P, T)$$

The NIST Refprop database was used to determine  $\rho_{bulk}$  at each temperature and pressure.(6) The total pore volume of UiO-67-bpy was determined from a previously 77 K  $\text{N}_2$  adsorption isotherm to be  $0.99 \text{ cm}^3/\text{g}$  from the an uptake of mmol/g at  $P/P_0$  of 0.9. The crystallographic density of UiO-67-bpy is  $0.747 \text{ g}/\text{cm}^3$ .

Note that the unit  $v/v$  is equivalent to  $\text{cm}^3_{\text{STP}} \text{ cm}^{-3}$ , where  $\text{cm}^3_{\text{STP}}$  is defined as the volume occupied by an ideal gas at standard temperature and pressure (STP). Here, STP is defined as 273.15 K and 1 atm, resulting in a volume of 22.414 mL for 1 mmol of ideal gas at STP.



**Table S3.** High-pressure CH<sub>4</sub> adsorption data for UiO-67-bpy at 25 °C.

| Pressure<br>(bar) | Excess CH <sub>4</sub> adsorbed<br>(mmol/g) | Total CH <sub>4</sub> adsorbed<br>(mmol/g) | Total CH <sub>4</sub> adsorbed<br>(v/v) |
|-------------------|---------------------------------------------|--------------------------------------------|-----------------------------------------|
| 0.9               | 0.4                                         | 0.5                                        | 7.6                                     |
| 2.1               | 1.0                                         | 1.1                                        | 17.7                                    |
| 4.1               | 1.8                                         | 2.0                                        | 33.4                                    |
| 5.8               | 2.5                                         | 2.7                                        | 45.6                                    |
| 7.8               | 3.2                                         | 3.5                                        | 58.7                                    |
| 10.1              | 3.9                                         | 4.3                                        | 72.4                                    |
| 12.6              | 4.6                                         | 5.1                                        | 85.6                                    |
| 15.2              | 5.2                                         | 5.9                                        | 98.0                                    |
| 20.1              | 6.2                                         | 7.0                                        | 117                                     |
| 25.1              | 7.0                                         | 8.1                                        | 135                                     |
| 30.1              | 7.6                                         | 8.9                                        | 149                                     |
| 35.1              | 8.2                                         | 9.6                                        | 161                                     |
| 40.0              | 8.5                                         | 10.2                                       | 172                                     |
| 45.2              | 8.9                                         | 10.8                                       | 181                                     |
| 50.0              | 9.2                                         | 11.3                                       | 190                                     |
| 54.6              | 9.4                                         | 11.8                                       | 197                                     |
| 59.6              | 9.5                                         | 12.1                                       | 203                                     |
| 65.0              | 9.6                                         | 12.5                                       | 209                                     |
| 69.5              | 9.7                                         | 12.8                                       | 215                                     |
| 75.0              | 9.7                                         | 13.1                                       | 219                                     |
| 80.1              | 9.7                                         | 13.4                                       | 224                                     |

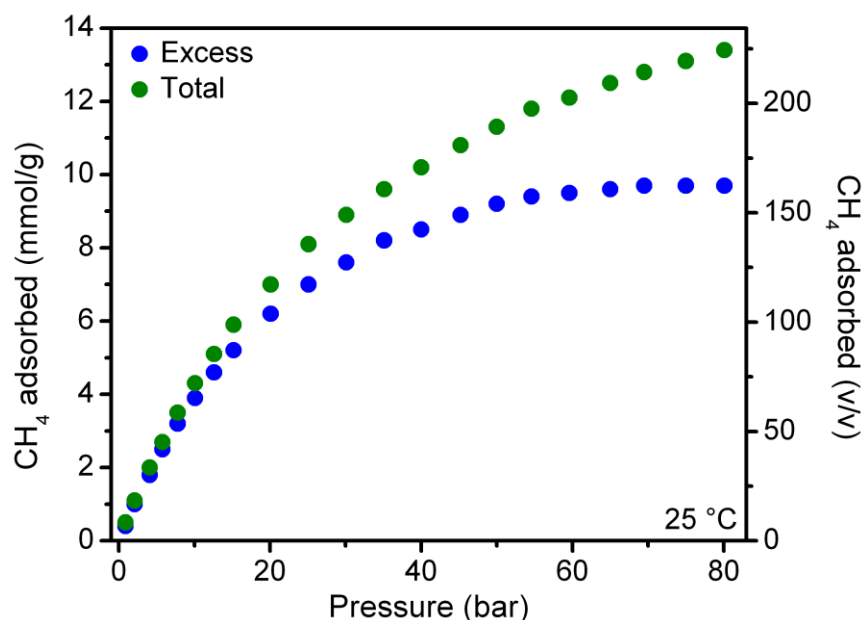

Figure S3. Excess and total CH<sub>4</sub> adsorption isotherms for UiO-67-bpy at 25 °C.

## Comparison to experiment: CH<sub>4</sub> adsorption of in MOF-5

In this section, we demonstrate the applicability of the methodology used in the main manuscript to predict reasonable usable capacities by comparing to experimental gas measurement results for MOF-5. The calculations for MOF-5 are performed on cluster models for the metal-cluster in MOF-5 and are shown in Figure S4. Model M2 is designed for studying adsorption on and near the face of the metal cluster (“cup-site”), by retaining the cluster itself and three coordinating linkers. The other three remote linkers are truncated by replacing their aromatic ring by methyl groups. Model M3 is designed for studying adsorption on the top of the metal cluster (“top-site”). It retains the metal cluster, and three relevant linkers while others are truncated by methyl groups.

Figure S4. Models for MOF-5 adsorption sites. M1 represents the metal-cluster (Zn<sub>4</sub>O<sup>6+</sup>) coordinated by six linkers, represented by phenyl carboxylate (C<sub>7</sub>O<sub>2</sub>H<sub>6</sub><sup>-</sup>). M2 and M3 are truncated versions of M1. M2 is used for studying CH<sub>4</sub> adsorption on the “cup-site” and M3 is used for the “top-site”.

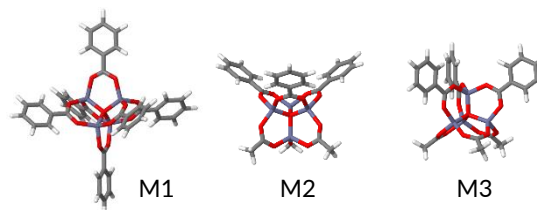

Model geometries are derived from the crystal structure obtained from the Cambridge Crystallographic Data Center, CSD entry SAHYIK01. Geometry optimization of the adsorbed molecules involves constraining the geometry of the cluster atoms to their crystalline locations, while optimizing the locations of the hydrogen atoms and the adsorbed CH<sub>4</sub> molecules. All calculations are performed using the B97M-V density functional.<sup>(7)</sup> Due to the large size of the cluster the basis set used for geometry optimization is 6-31g\*, smaller than the basis used in the main-manuscript. Interaction energies are calculated using the def2-qzvp basis without counterpoise correction. The optimized geometries are verified to be minima on the potential energy surface using partial hessian analysis for the atoms of the adsorbed molecules. The calculated energies are shown in Table S4.

Table S4. Adsorption energies, in kJ/mol for the four different adsorption sub-sites on the cup-site.

|    | $\Delta E_{\text{ads}}$ | Multiplicity |
|----|-------------------------|--------------|
| c1 | -18.9                   | 1            |
| c2 | -12.1                   | 3            |
| c3 | -12.0                   | 3            |
| t1 | -12.0                   | 1            |

**Adsorption on the cup-site.** It is found that there are three CH<sub>4</sub> adsorption sub-sites in the cup-site. The first sub-sites to be occupied, denoted by c1, is positioned above the center of the cluster. The second sub-site to be occupied, denoted by c2, is found between the two aromatic rings and is triply degenerate. The third sub-site, denoted by c3, is found above the aromatic rings and is also triply degenerate and are shared with adjacent metal-clusters. The cup-site can therefore adsorb up to seven CH<sub>4</sub> molecules when fully saturated.

Cup-site adsorption is a sequential, step-wise, reaction: for a CH<sub>4</sub> molecule to be adsorbed on c2, the c1 sub-site must first be occupied and for adsorption on c3, two adjacent c2 sub-sites must be occupied. This is a feature of the potential energy surface (PES) of the reaction: unless c1 is already adsorbed, c2 is not a minimum of the PES. Adsorption of a single CH<sub>4</sub> on c3 is not completely dependent on the presence of molecules in c2 and exists as a minimum of the PES in its absence with a relatively low  $\Delta E_{\text{ads}}$ , if c1 is occupied.

**Adsorption on the top-site.** The “top-site” is located on the ZnO<sub>4</sub> cluster, above zinc atom and is can adsorb a single CH<sub>4</sub> molecule at t1.

**Adsorption model.** To connect the results above to experimentally measured adsorption isotherms, an adoption model is devised. The model assumes that a molecule cannot adsorbed on c2 unless c1 is also occupied. Also, a molecule cannot adsorb on a c3 sub-site, unless the two adjacent c2 sub-sites are also occupied.

The adsorption model is manifested by the adsorption polynomial,  $Q$  which represents the relative weight of each possible adsorption configuration. The form of  $Q$  is:

$$Q = K_{c1}K_{c2}^3K_{c3}^3p^7 + 3K_{c1}K_{c2}^3K_{c3}^2p^6 + 3K_{c1}K_{c2}^3K_{c3}p^5 + K_{c1}K_{c2}^3p^4 + 3K_{c1}K_{c2}^2K_{c3}p^4 + 3K_{c1}K_{c2}^2p^3 + 3K_{c1}K_{c2}p^2 + K_{c1}p + 1$$

The  $p^i$  term is the pressure of CH<sub>4</sub>, raised to  $i$ 'th power where  $i$  is the number of adsorbed molecules. The  $K_j$  terms are the equilibrium constants for configuration  $j$  and are evaluated using the well-known relation  $K_j = \exp(-\Delta G_j/RT)$  where  $\Delta G_j$  is the free energy of adsorption. If configuration  $K_j$  is degenerate,  $K_j$  is multiplied by the number of possible combinations  $c_j$ . The average number of CH<sub>4</sub> molecules that occupy the site at a given pressure,  $\theta(p)$ , is given by:

$$\theta(p) = Q^{-1} \sum_j i K_j p^i$$

The value of  $\theta(p)$  can be as high as the maximal number of adsorbed molecules, which is six and half in this case in this case.

The CH<sub>4</sub> uptake at a given pressure,  $n_{\text{ads}}(p)$ , is given by:

$$n_{\text{ads}}(p) = \theta_{c1}(p) \cdot n_{1\text{CH}_4} + \theta_{c2}(p) \cdot n_{1\text{CH}_4} + \theta_{c3}(p) \cdot n_{1\text{CH}_4}/2$$

where  $n_{sat}$  is maximal CH<sub>4</sub> uptake of a single adsorption sub-site. The contribution of the c3 sites,  $\theta_{c3}(p)$ , is halved since they are shared with adjacent metal clusters.

The value of  $n_{sat}$  is derived from the crystal structure, given that the concentration of a single adsorbed CH<sub>4</sub> is similar to the concentration of its adsorption site. The value of  $n_{sat}$  is found to be 70.38 v[STP]/v. The free energy of adsorption,  $\Delta G_{ads}$ , is evaluated assuming a constant value of  $\Delta S_{ads} = -9.5R$  which represents an characteristic value measured for materials used for adsorptive storage applications.(3,4) The enthalpy of adsorption, is evaluated as:  $\Delta H_{ads} = \Delta E_{ads} - RT + E_{vib}$  where  $E_{vib}$  is the internal energy of a single vibration that is formed when a CH<sub>4</sub> molecule loses one of its translational degrees of freedom by being adsorbed to the surface.

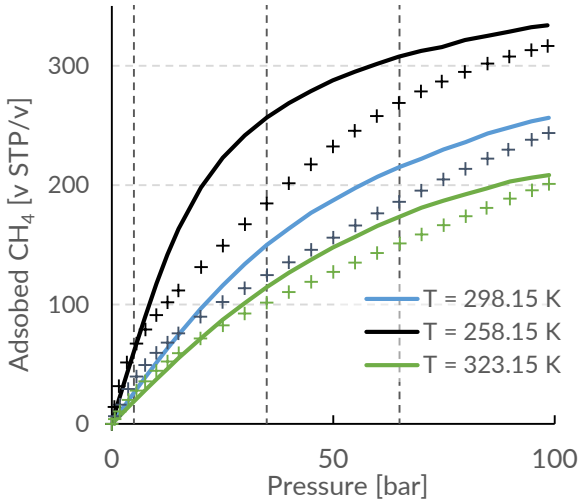

Figure S5. MOF-5 adsorption isotherms at various temperatures. Experimental and theoretical-model curves are marked by solid lines and crosses respectively.

A comparison of the experimental vs. model isotherms is shown in Figure S5. Considering that no parameters are fitted, the results are in good agreement with experiment. The model over-adsorbs in both higher and lower pressures, presumably due to inaccurate values of  $\Delta S_{ads}$  which are too low. The actual values of  $\Delta S_{ads}$  in c1 and c3 are expected to be higher than the value used, since the molecular motions are more restricted for molecules adsorbed on these sub-sites; c1 is tightly bonding with a relatively high  $\Delta E_{ads}$  and

motions in c3 are restricted due to the presence of two near neighbors in adjacent c2 sub-sites.

At lower temperature (T=253.15 K) the predicted isotherm underestimates CH<sub>4</sub> uptake at the range of approximately 5 to 50 bar, presumably due to increasing importance of lower adsorption-energy sub-sites on the linkers, which are not accounted for in this model. Also, stand-alone adsorption on c3, with no adjacent molecules in c2 might become significant. Lastly,  $\Delta S_{ads}$  is possibly temperature dependent and can increase at lower temperatures.

**Usable capacity.** A comparison of the usable capacities obtained by the model vs. experimental results for MOF-5 are shown in Table S5. The usable capacity is defined as:

$$n_{usable} = \theta(p_{max} - p_{min}) \times n_{sat}$$

This is equivalent to the difference in the amount of CH<sub>4</sub> adsorbed at high pressure (35 or 65 bar) minus the minimal pressure of 5.8 bar. At  $P_{max} = 35$  bar the model provides a qualitative level of agreement, while better accuracy is achieved for  $P_{max} = 65$ . Presumably, the main origin of error is the model's tendency to over-bind at lower pressures.

Table S5. Usable capacity of MOF-5. Comparison between theory and experiment.

|                           |                          | Temp.<br>[K] | Exp.<br>[v/v] | Model<br>[v/v] | % Err. |
|---------------------------|--------------------------|--------------|---------------|----------------|--------|
| P <sub>min</sub> =5.8 bar | P <sub>max</sub> =35 bar | 298.15       | 121           | 85             | -30%   |
|                           |                          | 258.15       | 190           | 117            | -48%   |
|                           |                          | 311.15       | 106           | 79             | -26%   |
|                           |                          | 323.15       | 94            | 74             | -21%   |

|                           |                          | Temp.<br>[K] | Exp.<br>[v/v] | Model<br>[v/v] | % Err. |
|---------------------------|--------------------------|--------------|---------------|----------------|--------|
| P <sub>min</sub> =5.8 bar | P <sub>max</sub> =65 bar | 298.15       | 186           | 146            | -22%   |
|                           |                          | 258.15       | 279           | 229            | -18%   |
|                           |                          | 311.15       | 165           | 126            | -23%   |
|                           |                          | 323.15       | 145           | 111            | -23%   |

## References

1. Li H, Eddaoudi M, O'Keeffe M, Yaghi OM. Design and synthesis of an exceptionally stable and highly porous metal-organic framework. *Nature*. 1999 Nov 18;402(6759):276–9.
2. Li L, Tang S, Wang C, Lv X, Jiang M, Wu H, et al. High gas storage capacities and stepwise adsorption in a UiO type metal-organic framework incorporating Lewis basic bipyridyl sites. *Chem Commun*. 2014 Feb 4;50(18):2304–7.
3. Mason JA, Veenstra M, Long JR. Evaluating metal-organic frameworks for natural gas storage. *Chem Sci*. 2013 Nov 26;5(1):32–51.
4. Bhatia SK, Myers AL. Optimum Conditions for Adsorptive Storage. *Langmuir*. 2006 Jan;22(4):1688–700.
5. Gonzalez MI, Bloch ED, Mason JA, Teat SJ, Long JR. Single-Crystal-to-Single-Crystal Metalation of a Metal-Organic Framework: A Route toward Structurally Well-Defined Catalysts. *Inorg Chem*. 2015 Mar 16;54(6):2995–3005.
6. Lemmon E, McLinden M, Huber M. REFPROP: Reference fluid thermodynamic and transport properties. NIST Stand Ref Database. 2007;23(8.0).
7. Mardirossian N, Head-Gordon M. Mapping the genome of meta-generalized gradient approximation density functionals: The search for B97M-V. *J Chem Phys*. 2015 Feb 21;142(7):074111.
